1 PcoB is a defense outer membrane protein that facilitates cellular  
2 uptake of copper.

3 Ping Li<sup>1#</sup>, Niloofar Nayeri<sup>1#</sup>, Kamil Gorecki<sup>1</sup>, Eva Ramos Becares<sup>2</sup>, Kaituo Wang<sup>2</sup>, Dhani Ram  
4 Mahato<sup>3</sup>, Magnus Andersson<sup>3</sup>, Sameera Abeyrathna<sup>4</sup>, Karin Lindkvist-Petersson<sup>1</sup>, Gabriele  
5 Meloni<sup>4</sup>, Julie Winkel Missel<sup>2</sup> & Pontus Gourdon<sup>1,2,\*</sup>

6 1 Lund University, Department of Experimental Medical Science, Sölvegatan 19, SE-221 84, Lund,  
7 Sweden

8 2 University of Copenhagen, Department of Biomedical Sciences, Nørre Allé 14, DK-2200,  
9 Copenhagen N, Denmark

10 3 Department of Chemistry, Umeå University, Linneaus Väg 10, 901 87 Umeå, Sweden

11 4 Department of Chemistry and Biochemistry, The University of Texas at Dallas, 800 W Campbell  
12 Rd., Richardson, TX 75080, USA

13

14 \* corresponding author

15 # contributed equally

16 **Email: [pontus.gourdon@med.lu.se](mailto:pontus.gourdon@med.lu.se)**

17 **Classification**

18 Major: Biological sciences

19 Minor: Biochemistry

20

21 **Keywords**

22 Outer Membrane Protein Structure, Gut microbiota, PcoB

23

24 **Author Contributions**

25 P.L. and P.G. identified and developed the project

26 P.L. crystallized PcoB

27 P.L. and P.G. solved the structure

28 P.L. refined the structure

29 P.L., N.N., K.G., J.W.M., K. L-P and P.G. analyzed the structure

30 N.N. purified constructs for the ICP-MS and liposome experiments

31 S.A. and G.M. performed ICP-MS experiments

32 N.N., E.R.B., J.W.M. performed liposome experiments

33 J.W.M. performed the EVcouplings analysis

34 D.R.M. and M.A. performed and analyzed MD simulations

35 P.L., N.N. and K.G. wrote the initial draft

36 P.L., N.N., K.G., J.W.M. and P.G. finalized the manuscript with comments from all authors

37 **Abstract (max 250)**

38

39 Copper (Cu) is one of the most abundant trace metals in all organisms, involved in a plethora of  
40 cellular processes. Yet elevated concentrations of the element are harmful, and interestingly  
41 prokaryotes are more sensitive for environmental Cu stress than humans. Various transport  
42 systems are present to maintain intracellular Cu homeostasis, including the prokaryotic plasmid-  
43 encoded multiprotein *pco* operon, which is generally assigned as a defense mechanism against  
44 elevated Cu concentrations. Here we structurally and functionally characterize the outer membrane  
45 component of the Pco system, PcoB, recovering a 2.2 Å structure, revealing a classical β-barrel  
46 architecture. Unexpectedly, we identify a large opening on the extracellular side, linked to a  
47 considerably electronegative funnel that becomes narrower towards the periplasm, defining an ion  
48 conducting pathway as also supported by metal binding quantification via ICP-MS and MD  
49 simulations. However, the structure is partially obstructed towards the periplasmic side, and yet  
50 flux is permitted in the presence of a Cu gradient as shown by functional characterization *in vitro*.  
51 Complementary *in vivo* experiments demonstrated that isolated PcoB confers increased sensitivity  
52 towards Cu. Aggregated, our findings indicate that PcoB serves to permit Cu import. Thus, it is  
53 possible the Pco system physiologically accumulates Cu in the periplasm as a part of an  
54 unorthodox defense mechanism against metal stress. These results point to a previously  
55 unrecognized principle of maintaining Cu homeostasis and may as such also assist in the  
56 understanding and in efforts towards combatting bacterial infections of Pco-harboring pathogens.

57

58

59 **Main Text**

60

61 **Introduction**

62 Copper (Cu) is a transition metal essential for virtually all organisms , for example serving as a co-  
63 factor for a number of enzymes involved in redox reactions. However, elevated Cu levels is  
64 associated with mismetallation and damage to proteins and cells, and catalyze toxic reactive  
65 oxygen and nitrogen species production via redox cycling (2). Strikingly, mammals are frequently  
66 more tolerant to increased Cu levels in the surroundings than prokaryotic counterparts (3).  
67 Organisms have developed mechanisms for tight regulation of the Cu levels (4). The significance  
68 of maintained Cu homeostasis is underscored by the many different protein networks linked to this  
69 process. In *Escherichia coli*, the cytoplasm is maintained devoid of free Cu via its export mediated  
70 by the Cue/Cop system, regulated by the transcription factor CueR (5) (**Figure 1, yellow** (6, 7)).  
71 CopA, an inner membrane P-type ATPase, extrudes Cu<sup>+</sup> ions to the periplasm (8), where it is  
72 oxidized to less toxic Cu<sup>2+</sup> by CueO, a multicopper oxidase (9). When this response is overwhelmed  
73 or under anaerobic conditions, when the CueO oxidase is inactive, the Cus-mediated Cu export  
74 assembly is activated (**Figure 1, magenta** (10)). Cus connects the inner and outer membranes,  
75 spanning the entire periplasm (10) through three proteins CusCBA, and is energized by the tripartite  
76 resistance-nodulation-cell division (RND) CusA component, collectively providing capacity to  
77 export Cu<sup>+</sup> from the cytoplasm directly out of the cell (11). Additionally, CusF, a periplasmic Cu-  
78 sequestering protein, delivers the metal directly to CusB for efflux (12). The expression of the Cus  
79 constituents is regulated by CusRS (13, 14). Considering the Cus system limitations,  
80 complementary Cu homeostasis proteins exist, most notably the plasmid-born Cu resistance Pco  
81 system (**Figure 1, cyan**). This operon was first detected in *E. coli* from the gut flora of pigs fed at  
82 high Cu diet (15); Cu in combination with antibiotics have been used as growth promotor in pig  
83 diets for at least 45 years (16).

84

85 The Pco proteins have been shown to enable bacteria to survive at higher Cu concentrations,  
86 although *E. coli* strains lacking the genes accumulates less Cu in the periplasm and exhibit higher  
87 Cu efflux (15, 17). Underscoring the significance of the Pco assembly, homologous proteins are  
88 frequently present on chromosomes or plasmids of other bacteria, where they also have been  
89 linked to increased Cu tolerance (15, 18). Nonetheless, there is growing evidence congruent with  
90 the Pco proteins also being involved in Cu uptake (17, 19), seemingly in conflict with the observed  
91 role for Cu defense. Thus, even the physiological role of the Pco proteins for Cu homeostasis in  
92 bacteria remains enigmatic.

93

94 The pco gene cluster in *E. coli* encompasses seven genes, pcoABCDRSE (20). The PcoRS is a  
95 two-component regulatory system, analogous to CusRS, sensing the periplasmic Cu

96 concentrations (20). PcoE resides in the periplasm and binds Cu, predicted to serve as a ‘molecular  
97 sponge’, thereby decreasing the free Cu concentration in the compartment between the two cell  
98 membranes (21). PcoD represents an inner membrane protein, and the function is likely tightly  
99 linked to periplasmic PcoC as they often exist as a fusion protein. For example, the *Bacillus subtilis*  
100 single protein YcnJ shares high sequence homology to the two PcoCD components. Deletion of  
101 YcnJ is associated with impaired growth in low Cu media suggesting a putative role in Cu  
102 acquisition (17), while expression of PcoABD leads to Cu hypersensitivity in the absence of PcoC  
103 (22).

104

105 Similarly to PcoCD, PcoAB have been proposed to work together as the primary actors in pco-  
106 dependent Cu resistance (23). While PcoA is a periplasmic multicopper oxidase, distantly related  
107 to CueO, PcoB resides in the outer membrane and has an elusive function (20). PcoB has been  
108 suggested to prevent Cu uptake from the cellular outside (24), however, since CopA appears  
109 necessary for Pco-dependent Cu resistance, PcoB is generally believed to be a Cu-specific  
110 transport protein, acting in concert with PcoA (24). Homologues of PcoAB are regularly encoded in  
111 close proximity in Gram-negative bacteria, and whereas PcoA is sometimes found alone, PcoB is  
112 always accompanied by PcoA, suggesting the interaction between the two and that PcoB requires  
113 PcoA for the Cu-transport function (25). For instance, expression of PcoB alone in the absence of  
114 PcoA in a  $\Delta pcoAB$  *Caulobacter crescentus* strain did not rescue the Cu-sensitive phenotype (26).  
115 However, PcoC was also shown to be needed for full resistance of the Pco system, and to interact  
116 with PcoA, possibly serving as a periplasmic Cu-chaperone (27). Collectively, the molecular details  
117 of the function and the regulation of the Pco system remains elusive.

118

119 In this work, we set out to elucidate the physiological role and functional properties of PcoB. We  
120 determine the 3D structure and characterize the protein function *in vitro* and *in vivo*. Our findings  
121 shed fundamentally new light on the role of the Pco system in Cu homeostasis.

122

## 123 **Results and Discussion**

124

### 125 **Pco confers cell survival at elevated Cu levels but isolated PcoB sensitizes to Cu stress**

126 To further dissect the physiological role of the Pco system, we first compared *E. coli* cells  
127 transfected with a vector harboring the operon or a similar control vector lacking the Pco  
128 components. Using electron microscopy, the strains were studied at low and high Cu levels,  
129 respectively. While in a Cu-low environment both systems emerged as healthy intact cells (**Figure**  
130 **2A upper panels**), the strain without the Pco system appeared impeded under Cu stress (**Figure**  
131 **2A left bottom panel**). In contrast, cell viability was maintained at high Cu concentrations for the  
132 cells with the *pco* operon (**Figure 2A right bottom panel**), yet displaying a somewhat different

133 morphology compared to the cells proliferated in Cu-depleted conditions. Specifically, the Pco  
134 harboring cells preserve the overall shape and display separation of the cell interior from the plasma  
135 membrane, while many cells without the Pco system have adopted an elongated character, with  
136 certain cells even appearing disrupted. Collectively, these findings suggest the Pco proteins serve  
137 a role for cell survival at elevated Cu concentrations, congruent with the bulk of the literature on the  
138 system. Nonetheless, the more rarely detected, somewhat contracting, observation of Pco-  
139 mediated import is puzzling (28), and highlights the enigmatic role of PcoB, representing the first  
140 line of defense from the outside. Is it facilitating import or export of Cu?

141

142 Next, to shed further light on the specific function of PcoB, we investigated the protein outside of  
143 the context of the other Pco proteins. Surprisingly, *E. coli* cells containing PcoB showed increased  
144 sensitivity towards Cu compared to cells without the protein in a growth assay (**Figure 2B**). Thus,  
145 PcoB appears to serve as an importer, alternatively other components of the Pco system are  
146 necessary for the system to operate as an exporter, as CusA is required for CusC.

147

#### 148 **The molecular structure of PcoB**

149 To elucidate underlying mechanism behind the observed contradicting physiological responses, we  
150 sought out to obtain high-resolution structural information of PcoB. The protein was overproduced,  
151 extracted from *E. coli* outer membranes and purified to near homogeneity, eluting at a size-  
152 exclusion chromatography (SEC) retention volume that indicated monomeric particle distribution.  
153 However, efforts to crystallize full-length PcoB, PcoB<sub>FL</sub>, were fruitless. In contrast, N-terminally  
154 truncated PcoB, PcoB<sub>Δ32-82</sub> (**Figure 3 - figure supplement 1**), a form that does not alter the Cu-  
155 binding properties (**Figure 3A**), successfully yielded crystals in the presence of the detergent C<sub>8</sub>E<sub>4</sub>,  
156 which diffracted to 2 Å. Nevertheless, a reliable molecular replacement solution was not identified.  
157 Instead, the structure was determined using single-wavelength anomalous diffraction (SAD) based  
158 on SeMet-data (**Table 1**) and refined to R/Rfree=0.22/0.26. Overall, the generated electron density  
159 maps are of high-quality, permitting assignment of individual sidechains (**Figure 3B**), with the  
160 exception for the N-terminus and a single loop (residues Gly82-Ala89 and Asp230-Arg238), which  
161 appears disordered (**Figure 3 - figure supplement 2**).

162

163 The structure discloses a classical β-barrel (**Figure 3C**), formed by 12 antiparallel strands that span  
164 the outer membrane *in vivo*. The termini are located at the same end of the barrel, in agreement  
165 with periplasmic localization, as established by numerous studies on proteins with a barrel topology  
166 (29). The strand linking loops are generally short, except for a loop with a helix insertion, stretching  
167 into the extracellular space (**Figure 3C**). Notably, the overall fold is reminiscent to that of the outer  
168 membrane phospholipase A1 (OmpLA), despite low sequence similarity and unique molecular  
169 functions (**Figure 3D**). Indeed, OmpLA contains extensive loops blocking the orifice, and a

170 hydrophobic interior (30), characteristics that separate the protein types. However, the architecture  
171 of the PcoB barrel is flattened as a consequence of inter-barrel contacts between charged amino  
172 acids, thus restricting the width (**Figure 3C and E** and **Figure 4D and E**), whereas these interactions  
173 of OmpLA are caused by hydrophobicity. The majority of the sheets consist of alternating  
174 hydrophobic and hydrophilic residues, facing the surrounding environment and pointing into the  
175 channel, respectively, as typical for outer membrane proteins. Equivalently, sequence (Clustal  $\Omega$ )  
176 and surface (ConSurf) (31) conservation analyses suggest residues with sidechains located inside  
177 the  $\beta$ -barrel to be relatively conserved, while membrane exposed amino acids are not (**Figure 3E**,  
178 **Figure 3 - figure supplement 3**). Thus, it is conceivable that PcoB operates as a monomer, as  
179 also supported by the single molecule observed in the asymmetric unit of the crystal packing.

180

### 181 **PcoB harbors a highly electronegative pore compatible with Cu uptake**

182 Strikingly, a 12x18 Å wide cavity is present on the extracellular side (**Figure 4A**, top right), as  
183 established by condensed loops between strands in the region leaving the aperture uncovered.  
184 From this region, a funnel-like pore (**Figure 4C-E**, **Figure 4 - figure supplement 1A**) is penetrating  
185 almost the entire barrel, becoming narrower towards the periplasm, with a remarkably  
186 electronegative funnel surface throughout (**Figure 4A**, bottom right). The outline of the pore is  
187 supported by the presence of numerous and continuous crystal waters (the maximum observed  
188 oxygen-to-oxygen distance is 4.4 Å) (**Figure 4 - figure supplement 1A**). Along the pore, multiple  
189 negatively charged-paired residues are present, in particular: Glu130-Glu223 towards the  
190 extracellular side, Asp97-Glu207 and Asn115-Gln179 towards the periplasm, which are both  
191 placed perpendicular to Glu187 (**Figure 4C-E**). The Glu130-Glu223 and Asp97-Glu207 pairs are  
192 both highly conserved among PcoB proteins, and form interacting carboxylic acid-carboxylate  
193 hydrogen bonds that assist in flattening the barrel, and at the same time lines the pore. This  
194 negatively charged interior reminds of the outer membrane protein component, CusC, of the  
195 CusABC system (**Figure 4B**) (32). The pore properties and the similarity to CusC are congruent  
196 with PcoB metal conductance as  $\text{Cu}^{2+}$  rather than  $\text{Cu}^+$ . This is because, based on the HSAB  
197 Pearson theory (33),  $\text{Cu}^+$  typically rely on soft ligand coordination (Met and Cys) for ion transfer,  
198 while the  $\text{Cu}^{2+}$  is favored by funneling and potential coordination by harder ligands (such as Asp,  
199 Glu or His). The presence of these potential transient ligands in the pore hints at inward  $\text{Cu}^{2+}$  flux  
200 (from the outside), considering the highly electronegative surface on the extracellular side,  
201 presumably attracting divalent ions from the outside of cells. However, the structure was obtained  
202 in Cu-free conditions, and consequently there are no indications of the metal in the pore.  
203 Analogously, soaking and co-crystallization experiments to identify Cu presence in the pore were  
204 fruitless. In contrast, inductively coupled plasma mass spectrometry (ICP-MS) data on purified  
205 protein suggest  $\text{Cu}^{2+}$  is bound in the pore when metal has been supplemented to the sample as  
206 PcoB<sub>FL</sub> and PcoB $\Delta_{27-81}$  each display one bound  $\text{Cu}^{2+}$  per molecule (**Figure 3A**). Corresponding

207 analysis using ICP-MS of the of the Asp97Lys mutant indicates a significantly impaired  $\text{Cu}^{2+}$  binding  
208 to PcoB (approximately 70 % lower than PcoB<sub>FL</sub>) in agreement with the Asp97-Glu207 being  
209 directly involved in high affinity Cu binding at the end of the funnel or that the anticipated salt-bridge  
210 in the mutant prevents Cu passage, closing the pore (**Figure 5, Figure 4 - figure supplement 1**).

211

212 In this light, we set out to investigate if PcoB indeed facilitates  $\text{Cu}^{2+}$  flux across cellular membranes.  
213 Utilizing a protocol developed for reconstitution and flux measurements of other porins (34), PcoB<sub>FL</sub>  
214 and the Asp97Lys mutant were successfully reconstituted, and protein-free liposomes employed  
215 as a as control (**Figure 6**). As evident from the averaged traces from three reconstitutions, wild-  
216 type clearly conducts  $\text{Cu}^{2+}$  (**Figure 6A**), while the mutation appears less active than the wild-type  
217 (**Figure 6B**), suggesting the central Asp97 represents a key feature for permitting Cu binding and  
218 flux.

219

### 220 **The periplasmic constriction**

221 In contrast to the extracellular side, the waterline of the pore becomes partially obstructed at the  
222 intersection between Asp97, Glu187, Asp209 and Glu207, with Asp209 and the adjacent Tyr184,  
223 being in proximity to the periplasm and yet capping the pathway together with Leu183 (**Figure 4C**,  
224 **Figure 4 - figure supplement 1**). Through analysis of the water molecules in the region detected  
225 in the structure, two possible  $\text{Cu}^{2+}$  paths are revealed towards the periplasm (**Figure 4C** and **Figure**  
226 **3A**), as also confirmed by surface analysis of the internal cavities. However, one of these is lined  
227 by several positive residues, most notably Arg250 and Arg293 in the immediate vicinity of Asp97-  
228 Glu207, disfavoring involvement in Cu passage (**Figure 4C**). In contrast, the second path is rich in  
229 negatively charged residues (**Figure 4C**), and links directly to the electronegative periplasmic  
230 vestibule (**Figure 4A**) through a network consisting of Asn115, Gln179 and Glu187 (**Figure 4C-E**)  
231 Notably, these three possible gate residues are well conserved (Asn115 is frequently replaced by  
232 other long-side chain residues) and, in addition, analysis of evolutionary coupled pairs using the  
233 EVcouplings server ( <https://evcouplings.org/> ) suggest Gln179 to be linked to Asn115, in  
234 agreement with a shared functional purpose (**Figure 4 - figure supplement 1**) (35). Alanine  
235 replacements of these residues had little to no effect on the binding stoichiometry as evaluated by  
236 ICP-MS experiments (**Figure 5**). This may suggest these amino acids are rather important for the  
237 overall Cu conductance when the pore is fully open, without establishment of discrete sites that  
238 would affect binding stoichiometry.

239

240 Considering we were unable to obtain a complementary structure in the presence of Cu, to further  
241 investigate how ions may bridge the restriction region, we instead generated alanine substitutions  
242 *in silico* of relevant residues to assess the effect on the local environment. Notably, mutations of  
243 Leu183, Tyr184 and Asp209 on the Arg250-Arg293 pathway do not result in a significant pore



244 widening (**Figure 4 - figure supplement 1C**), despite the presence of crystal waters along this  
245 pathway. On the other hand, replacements of the residues of the complementary vestibule, with  
246 Glu187, Asn115 and Gln179, resulted in a significant reduction of the constriction independent of  
247 mutation (**Figure 4 - figure supplement 1B**). Notably, mutation of Gln179 alone caused a  
248 substantial widening, hinting at the Asn115-Gln179-Glu187 vestibule pathway playing an important  
249 role for the Cu<sup>2+</sup> passage (**Figure 4 - figure supplement 1B**). Next, unbiased molecular dynamics  
250 simulations of the recovered PcoB structure were exploited to shed further light on the ion passage.  
251 Congruent with our structural analysis, we observed that Cu<sup>2+</sup> is not capable of passing through  
252 this constriction towards the periplasm (**Figure 5B**). Such behavior has however also been found  
253 for certain well-established ion channels such as CIC-1 (36), where a narrow constriction region is  
254 bridged by ion-transferring sidechains, representing a possible role of Asn115-Gln179-Glu187 in  
255 PcoB.

256

257 We then reverted to our liposome assay to investigate wild-type and mutant PcoB forms *in vitro*  
258 (**Figure 6**). Indeed, alanine substitution of Asn115 and Glu187 with the intention to widen the pore  
259 elevated the Cu<sup>2+</sup> flux. The Asn115 form showed a dramatic three-fold increase of the transfer rate,  
260 while Glu187Ala was augmented by 50%, congruent with a role in gating of the ion transfer. Two  
261 double mutations of the constriction region, Asn115Ala/Gln179Ala and Glu187Ala/Gln179Ala,  
262 however yielded an additional band on SDS-PAGE following liposome reconstitution. We  
263 interpreted the response as a sign of instability and refrained from further analysis of these mutant  
264 forms (**Figure 6 - figure supplement 1, Figure 6 - table supplement 1, Figure 6 - source data**  
265 **1**). It is possible that the shift of Gln179 is responsible for the apparent degradation. Another mutant  
266 form in this region, Asp156Lys, demonstrated aggregation already in the size-exclusion purification  
267 (**Figure 6 - figure supplement 2**), perhaps due to the change of the local charge.

268

269 Analogously, alanine replacement of Leu183, a surface exposed residue that is capping the  
270 Arg250-Arg293 pathway, also suffered from instability as detected by SDS-PAGE. Tyr184Ala and  
271 Asp209Lys, the latter in immediate connection to Arg250, demonstrated a similar behavior as  
272 Asp156Lys, despite Tyr184 being in direct contact with the surrounding environment (data not  
273 shown). Thus, it is likely that Leu183, Tyr184 and Asp209 play a role in maintaining the local  
274 architecture rather than participating in ion flux (**Figure 6 - figure supplement 1, Figure 6 - table**  
275 **supplement 1, Figure 6 - source data 1**). The functional characterization was also complemented  
276 by ICP-MS measurements of several of the mutant forms that were possible to recover in detergent  
277 form, however the metal binding stoichiometry remain largely unaffected for all forms (**Figure 5**).  
278 Thus, it is likely bridging between the extracellularly exposed funnel and the periplasm does not  
279 include ion bindings sites per se, rather a direct transfer via amino acid ligands. Aggregated, these  
280 findings point towards an expected sensitivity for mutations of the periplasmic-facing region of

281 PcoB. Furthermore, the data suggest ion transfer is achieved via the single  $\text{Cu}^{2+}$ -binding site in the  
282 entire protein, located at the very end of the electronegative funnel at Asp97-Glu207 (mutation of  
283 which obstructs conductance). Next  $\text{Cu}^{2+}$  passage occurs through Asn115-Gln179-Glu187 (with  
284 pathway enlarging single alanine substitutions elevating the flux), and finally, via the  
285 electronegative vestibule that is in direct contact with the periplasm, without presence of distinct  
286 check points equivalent to Asp97-Glu187.

287

### 288 **The *pco* operon may act as a defense mechanism in high Cu environments**

289 The composition of the *pco* operon readily suggests its role in maintenance of periplasmic Cu  
290 levels: three of the core proteins are periplasmic proteins, responsible for detoxification (PcoA) and  
291 Cu binding (PcoC and E) (21, 22) (**Figure 1**). Moreover, the two-component system PcoRS, senses  
292 periplasmic Cu levels and regulates the expression of the other proteins, except PcoE that is  
293 regulated by CusRS (20). Additionally, the *pco* plasmid has no effect in cells that are unable to  
294 export cytoplasmic Cu: deletion of the  $\text{Cu}^+$  exporting P-type ATPase CopA abolishes the protective  
295 effect of *pco* (8), an observation that is in agreement with the notion that *pco* operon is a part of the  
296 periplasmic Cu defense mechanism.

297

298 The nature of the protection provided by the *pco* operon has remained unclear, yet the functions of  
299 three of the proteins are well-established: PcoE being a Cu “sponge”, capable of rapid binding a  
300 large number of Cu ions (21), and PcoC being a Cu chaperon that binds both  $\text{Cu}^+$  and  $\text{Cu}^{2+}$ , and  
301 delivers  $\text{Cu}^+$  to PcoA, a multicopper oxidase that catalyzes the oxidation of  $\text{Cu}^+$  to  $\text{Cu}^{2+}$ , rendering  
302 Cu less toxic (22). In contrast, the specific roles of the membrane proteins PcoB and PcoD have  
303 been more elusive. PcoB, a classical outer membrane protein as shown in this work, was previously  
304 suggested to provide an efflux pathway for periplasmic Cu, presumably as the last step of a  
305 molecular defense system against high environmental stress. However, such efflux requires energy  
306 input, as the exported ion moves against a gradient: the extracellular environment contains more  
307 Cu than the periplasm when cells are exposed to Cu stress.

308

309 Cu export to the extracellular side is achieved in *E. coli* by the CusFCBA system (**Figure 1 in**  
310 **magenta**), the architecture of which is however diametrically different than that of the *pco* system  
311 (**Figure 1 in cyan**). CusA is an inner membrane protein that exploits the energy stored in the proton  
312 gradient to pump out  $\text{Cu}^+$  ions via a large tunnel consisting of CusB and CusC proteins, together  
313 spanning the entire periplasm and forming an exit pathway through the outer membrane (12). The  
314 direct coupling between the inner membrane, the periplasm, and the outer membrane allows for  
315 the energy-requiring  $\text{Cu}^+$  export reaction to occur. The *pco* system does not contain proteins  
316 sufficiently large to form a direct contact to the inner membrane. It is possible that the Cu chaperone  
317 PcoC delivers  $\text{Cu}^{2+}$  to PcoB, which then becomes permeable upon PcoC binding, yet such scenario

318 still does not handle the issues with providing energy for the export against a gradient. These  
319 arguments all support the notion of PcoB serving as an importer, although such a function may be  
320 counter-intuitive for a defense system.

321

322 Upon environmental stress, the outer membrane becomes the first barrier in the defense. Non-  
323 specific porins are downregulated and a number of selective outer membrane proteins are rather  
324 inserted in the membrane, allowing for selective influx of required molecules while keeping the  
325 stressors outside the cell (37). It is possible to imagine a setup where Cu is allowed to leak into the  
326 periplasm to acceptable levels (i.e. enough to metallize the selected proteins, but not more). This  
327 would require a periplasmic control system, ready to react to elevated concentrations of Cu. A more  
328 sophisticated strategy of orchestrating the expression of a Cu-specific porin and downstream Cu  
329 chaperones would allow for more control and quicker response.

330

331 Our structural, functional and *in vivo* data corroborate the notion that PcoB play a role in such an  
332 unorthodox defense system. The structure is highly electronegative and harbors a considerable  
333 funnel freely accessible from the outside, clearly in agreement with attraction of charged matter in  
334 the surroundings (**Figure 4**). Nevertheless, PcoB is partially obstructed as detected by our  
335 structural analysis, suggesting a gradient may be necessary to allow passage. Indeed, Cu flux is  
336 permitted when a gradient is applied using the employed proteoliposome assay (**Figure 6**).  
337 Analogously, the complete PcoB system increases viability at elevated concentrations of Cu,  
338 although the morphology of the cells is altered, perhaps due to the increased levels of metal in the  
339 periplasmic space (**Figure 2**). In contrast, PcoB alone does not provide a similar molecular defense  
340 and instead increases the metal sensitivity, as the other components of the Pco assembly do not  
341 complex the imported Cu.

342

343 Taken together, our findings improve our understanding how bacteria handle excess environmental  
344 Cu, likely importing  $\text{Cu}^{2+}$  through PcoB to the periplasm which may serve a dual purpose of  
345 providing essential metal at low Cu conditions and/or sequester environmental metal under Cu-  
346 stress along generating a pool of periplasmic Cu that can be utilized for cellular import (by PcoB to  
347 the periplasm and perhaps also to the cytoplasm via PcoD) during Cu starvation. The results also  
348 open up an attractive possibility to increase the Cu sensitivity in PcoB containing pathogens through  
349 blockage of the electronegative funnel from the outside of the cells, as a means to combat  
350 infections.

351

352

353

354

355

## 356 **Materials and Methods**

357

### 358 ***In vivo* copper tolerance assays**

359 For the agar plate study, bacterial BL21(DE3) cells were transformed with plasmid pET-22b-PcoB  
360 and grown on LB-agar plates supplied with 50 µg/mL ampicillin for 16 h at 37 °C (these conditions  
361 were used for all copper tolerance growths unless otherwise is stated). Cells harboring empty  
362 vector pET-22b were used as control. A single colony was inoculated in 5 mL LB culture for  
363 approximately 8 h until the optical density at 600 nm ( $OD_{600nm}$ ) reached 0.8. The cells were spin  
364 down, washed and resuspended in fresh LB media to  $OD_{600nm}=0.1$ , and then diluted in 10-fold  
365 increments using LB media. 5 µL drops were spotted onto the LB-agar plates containing defined  
366 amounts of  $CuCl_2$  (0 and 1 mM), and with the media pH-adjusted to 7.0 (following supplementation  
367 of  $CuCl_2$ ). The plates were incubated at 37 °C for 16h to compare the growth of the colonies.

368

369 For the electron microscopy study, the transformed cells were first cultured in 5 mL LB to  
370  $OD_{600nm}=0.6$ , and then the cells were cultured for 16 h with starting  $OD_{600nm}=0.05$  in 5 mL containing  
371 the desired  $CuCl_2$  concentration (0 and 2 mM), with the pH of the media adjusted to 7.0 (following  
372 supplementation of  $CuCl_2$ ). The cultured cells were pelleted using 6000 xg for 10 min and then  
373 washed three times using PBS buffer to remove dead cells. Pellets of bacteria were fixed with 2 %  
374 v/v glutaraldehyde in 0.05 M sodium phosphate buffer (pH=7.2). The pellets were embedded in  
375 Agarose, rinsed three times in 0.15 M sodium phosphate buffer (pH=7.2), and subsequently  
376 postfixated in 1 % w/v  $OsO_4$  with 0.05 M  $K_3Fe(CN)_6$  in 0.12 M sodium phosphate buffer (pH=7.2) for  
377 2 h. The specimens were dehydrated in graded series of ethanol, transferred to propylene oxide  
378 and embedded in Epon according to standard procedures. Sections, approximately 60 nm thick,  
379 were cut with a Ultracut 7 (Leica, Vienna, Austria) and collected on copper grids with Formvar  
380 supporting membranes, stained with uranyl acetate and lead citrate, and subsequently examined  
381 with a Philips CM 100 Transmission EM (Philips, Eindhoven, The Netherlands), operated at an  
382 accelerating voltage of 80 kV. Digital images were recorded with an OSIS Veleta digital slow scan  
383 2k x 2k CCD camera and the ITEM software package.

384

### 385 **Expression and purification of PcoB**

386 The gene coding for *E. coli* PcoB including its signal peptide (UniProt Accession No.Q47453) was  
387 codon optimized and synthesized by Genscript. A 6xHis tag followed by a TEV cleavage site was  
388 introduced between S26 and V27 by overlap PCR to facilitate protein purification. The N-terminus  
389 was truncated using PCR, thereby removing 55 residues (27-81) to generate PcoB $_{\Delta 27-81}$  Next, the  
390 full-length PcoB and PcoB $_{\Delta 27-81}$  were cloned into the pET-22b expression vector using *NdeI* and  
391 *XhoI* cleavage sites. The expression plasmids were transformed into the C43 (DE3) *E. coli* strain.

392 Single colonies were incubated at 30 °C for 16 h in 5 mL LB medium supplemented with 100 mg/mL  
393 ampicillin. The preculture was transferred into 1 L LB cultures supplied with 100 mg/mL ampicillin  
394 and cultivated at 30°C with shaking at 180 rpm. Protein expression was induced at 25 °C for 16 h  
395 with final concentration of 0.5 mM Isopropyl β-D-1-thiogalactopyranoside (IPTG) when the  
396 OD<sub>600</sub>=0.6.

397

398 To solve the crystallographic phase problem via selenomethionine (SeMet) phasing, three mutants  
399 (L93M, L146M and L213M) were introduced to facilitate the SeMet labelling, yielding PcoB<sub>Δ27-81</sub>,  
400 <sub>3xL/M</sub>. The *E. coli* 834(DE3) strain and SelenoMet™ medium (Molecular Dimensions Limited) were  
401 used for the SeMet labelling protein expression. The PcoB<sub>Δ27-81</sub>, <sub>3xL/M</sub> plasmid was transformed into  
402 the *E. coli* 834(DE3) strain (a gift from LP3) and single colonies were inoculated in 5 mL LB medium  
403 supplemented with 100 mg/mL ampicillin at 37°C for 8 h. The cells were pelleted and washed 3  
404 times in 1 mL of sterile water, resuspended in 1 mL of sterile water and cultured at 37°C for 16 h in  
405 100 mL minimal media containing L-methionine. Next, the cells were pelleted and washed 3 times  
406 in 100 mL sterile water, resuspended in 1 mL water, transferred into 1 L minimal media containing  
407 L-SeMet, cultured for 2 h at 30°C, and then induced with 1 mM IPTG at 30°C for 6 h.

408

409 The cells were harvested by centrifugation at 8000xg, suspended in Tris buffer (20 mM Tris, pH=8,  
410 500 mM NaCl, 10 % v/v Glycerol) and disrupted using sonication. The cell lysate was centrifuged  
411 at 165,000xg in a Beckman ultracentrifuge (45 Ti rotor, Beckman) for 1 h and the membrane fraction  
412 was resuspended in the same Tris buffer containing 1 % w/v N-laurylsaccharide, and then stirred at 18  
413 °C for 1 h. Subsequently, the outer membrane was pelleted by ultracentrifugation at 165,000xg for  
414 1 h. The outer membrane pellets were solubilized in Tris buffer containing 2 % Elugent  
415 (Calbiochem) at 4°C for 16 h with stirring. The extract was centrifuged at 190,000xg for 30 min and  
416 the supernatant was loaded to 5 mL His-trap column (Cytiva) equilibrated with 30 mL Tris buffer  
417 containing 0.05 % w/v lauryldimethylamine N-oxide (LDAO). Then, the column was washed with 6  
418 column volume (CV) equilibration buffer containing 50 mM imidazole. The protein was eluted with  
419 equilibration buffer containing 300 mM imidazole. The eluted protein fractions were pooled,  
420 concentrated and buffer exchanged using Ultra-15 centrifugal concentrators (Amicon) with 50 kDa  
421 MW cut-off to remove excess imidazole. Next, TEV protease was added with a molar ratio of 1:10  
422 to remove the His tag through incubation at 4°C for 16 h. Subsequently, the cleaved sample was  
423 loaded to a pre-equilibrated 5 mL His-trap column using equilibration buffer. The tag removed  
424 protein sample was collected in flow-through and eluted with equilibration buffer containing 40 mM  
425 imidazole. Desired fractions were concentrated and buffer exchanged using 50 kDa MW cut-off  
426 concentrators (Amicon) to size-exclusion chromatography (SEC) buffer 20 mM Tris, pH=8.0, 100  
427 mM NaCl, 5 % w/w Glycerol and 0.4 % w/w C<sub>8</sub>E<sub>4</sub> detergent. As a polishing step, the protein was

428 finally SEC purified (Superdex 200 10/300; GE Healthcare) and the purified protein was  
429 concentrated to 10 mg/mL for the crystallization.

430

### 431 **Crystallization**

432 Initial crystallization for native PcoB and SeMet-PcoB was performed using MemGold, MemGold2,  
433 Memstar and MemSys screens from Molecular Dimensions by sitting-drop vapor diffusion using a  
434 Mosquito robot at the Lund protein production platform (LP3) by mixing 0.2  $\mu$ L protein sample with  
435 0.2  $\mu$ L reservoir solution. The initial hits appeared following two days in a condition with 8 % w/v  
436 PEG4000, 0.4 M NaSCN, 0.1 M sodium acetate, pH=4.0, and was optimized using grid- screening  
437 and using larger hanging-drop vapor diffusion drops. The best native PcoB crystals grew in 10 %  
438 w/v PEG4000, 0.8 M NaSCN, 0.1 M sodium acetate pH=4.0. SeMet-PcoB crystals were obtained  
439 from in 30 % w/v PEG400 and 0.1 M sodium citrate, pH=4.0. The crystals were cryoprotected,  
440 harvested and flash-cooled in liquid nitrogen for data collection at SLS.

441

### 442 **Data collection and structure determination**

443 Native and SeMet PcoB X-ray diffraction data was collected at the Paul Scherrer Institute,  
444 Switzerland on beam line X06SA (SLS). The data was processed and scaled using the software  
445 XDS (38). The crystals belonged to space group C2221 with cell parameters  $a = 64.489 \text{ \AA}$ ,  
446  $b = 75.538 \text{ \AA}$ ,  $c = 91.51 \text{ \AA}$ ,  $\alpha = \beta = \gamma = 90^\circ$ . The SeMet data was collected at the wavelength 0.9798  $\text{\AA}$ .  
447 Initial crystallographic phases were calculated by Phenix AutoSol using SAD phasing (39). 7  
448 Selenium atoms were located and refined, then Autobuild (40) was performed to generate the initial  
449 model. The initial structure was employed as starting model to determine the PcoB structure of  
450 high-resolution native dataset. Model building was performed manually in Coot (41) and refined by  
451 phenix.refine (42) in iterative steps. 198 residues were built and refined in the final structure with  
452 95.85 % of residues in the favoured region of the Ramachandran plot (**Table 1**). The final model  
453 displayed Ramachandran favored, allowed and outliers of 95.88, 4.12 and 0.00%, respectively.  
454 Rotamer outliers were 0.00% and the clash-score was 3.72.

455

### 456 **Cu<sup>2+</sup> binding stoichiometry determination with ICP-MS**

457 Cu<sup>2+</sup> binding stoichiometry to wild type PcoB and mutants was measured by inductively coupled  
458 plasma mass spectrometry (ICP-MS). The protein forms, purified as mentioned above, were diluted  
459 to 3-10  $\mu$ M with buffer containing 50 mM Tris, pH=8.0, 500 mM NaCl, 10 % w/v glycerol, and 0.05  
460 % w/v LDAO, or 20 mM Tris, pH=8.0, 500 mM NaCl, 10 % w/v glycerol, and 0.8 % w/v OG. 2-5  
461 molar equivalents of CuCl<sub>2</sub> were subsequently added to the protein solution and incubated at 18  
462 °C for 15 min and excess Cu<sup>2+</sup> was removed with 5 mL HiTrap desalting columns (Cytiva) packed  
463 with Sephadex G-25 resin, pre-equilibrated with the respective buffer. Following elution, the protein  
464 concentration was determined by a Bradford assay using BSA as standard. For ICP-MS sample

465 preparation, eluted protein samples were digested in 8 % v/v HNO<sub>3</sub> at 80 °C for 12 h. Samples  
466 were subsequently diluted to adjust the HNO<sub>3</sub> concentration to 3 % and ICP-MS was performed  
467 with a Hewlett-Packard 4500 ICP mass spectrometer (Agilent Technologies) connected to a  
468 CETACASX-500 auto-sampler for sample injection. Control experiments were conducted in the  
469 same buffer excluding the protein for background correction. For the binding experiment high-purity  
470 TraceSelect nitric acid, H<sub>2</sub>O and ICP-MS standards were purchased from Sigma-Aldrich.

471

#### 472 **Proteoliposome Cu<sup>2+</sup> flux assay**

473 PcoB forms were evaluated functionally in liposomes referred to as small unilamellar vesicles  
474 (SUVs). Following purification, wildtype PcoB and different mutants were reconstituted in liposomes  
475 with a lipid composition of *E. coli* polar lipids (Avanti, US) and 1-palmitoyl-2-oleoyl-sn-glycero-3-  
476 phosphocholine (POPC) (Sigma Aldrich) in a 3:1 molar ratio. The lipids were dissolved in  
477 chloroform in a glass vial to a concentration of 25 mg/mL followed by treatment using N<sub>2</sub> to form a  
478 thin lipid bilayer. The lipid film was kept under a N<sub>2</sub> stream for 2 h to achieve complete chloroform  
479 removal. The lipid film was rehydrated with reconstitution buffer (20 mM Tris, pH=7.4, 200 mM  
480 NaCl) with added fluorophore, 10 mM Pyranine (Sigma), to a concentration of 20 mg/mL lipids. The  
481 lipid suspension was applied to a sonication bath for 3 times x 15 min, with a 5 min break in-  
482 between the cycles. Next, the lipids were frozen in liquid nitrogen and thawed three times, and then  
483 the lipids were passed through a 100 nm polycarbonate filter 11 times, using an extruder (Mini-  
484 Extruder, Avanti). The lipids were diluted to 4 mg/mL with reconstitution buffer containing 25 % v/v  
485 glycerol and 1 % w/v OG, followed by gradual addition of 0.2 % w/v Triton X-100. PcoB and mutants  
486 were added to each their lipid suspension using a lipid-to-protein-ratio (LPR) of 20 and each sample  
487 was dialyzed for 16 h at 4 °C in reconstitution buffer. The samples were centrifuged at 57,000 xg  
488 for 1.5 h and the resulting pellets were suspended in reconstitution buffer. Traditionally, Cu<sup>2+</sup> flux  
489 assays are measured using fluorophores such as FluoZin-1 or -3, which are being activated by  
490 addition of Zn<sup>2+</sup> and quenched by addition of Cu<sup>2+</sup>. However, upon addition of Zn<sup>2+</sup> and Cu<sup>2+</sup> the  
491 PcoB protein appeared to degrade, in contrast to supplementation of Cu<sup>2+</sup> only, where only a single  
492 band is present on SDS-PAGE analysis. Consequently, we employed fluorescent dye pyranine,  
493 which has previously proven effective in measuring the flux of Cu<sup>2+</sup> ions (43-45). The assay was  
494 performed on an SX-20 Stopped-Flow Spectrometer system (Applied Photophysics) equipped with  
495 a 495 bandpass filter, where the liposomes were mixed with reaction buffer with 0.1 mM CuCl<sub>2</sub>.  
496 Data were collected at 510 nm at a 90° angle for 10 s. All data were collected at 18 °C. Empty  
497 liposomes were used as a negative control. The data were analyzed in Pro-Data Viewer (Applied  
498 Photosystems) and plotted in GraphPad Prism (v. 9.1.2). Data for each sample were the average  
499 of 5 readings. Data were fitted using a double exponential fit. The smallest rate constant is  
500 unaffected by changes in PcoB reconstitution efficiency, while the larger rate constant corresponds

501 liposomes containing PcoB. The rates were then adjusted using the wildtype experiments  
502 (equivalent to 100 % activity). The reconstitution experiments were performed three times to  
503 achieve data reproducibility. Error bars denote the k-rate standard deviation (SD) between the  
504 three separate reconstitutions (N = 3) for each construct. SD was calculated using GraphPad  
505 Prism.

506

### 507 **MD simulation system design and analyses**

508 The asymmetric lipid bilayer was built using the membrane builder (46) in CHARMM-GUI (47) with  
509 the inner leaflet containing 1,1'-palmitoyl-2,2'-vacenoyl cardiolipin (PVCL2), 1-palmitoyl(16:0)-2-  
510 palmitoleoyl(16:1 cis-9)-phosphatidylethanolamine (PPPE) and 1-palmitoyl(16:0)-2-vacenoyl(18:1  
511 cis-11)-phosphatidylglycerol (PVPG) lipids while the outer leaflet contained lipopolysaccharides  
512 (LPS) with lipid A of type 1 tail and core R1 and a 1 o-antigen polysaccharide chain (48). The  
513 protein was inserted into the membrane based on prediction from the Orientations of Proteins in  
514 Membranes (OPM) (49). Predicted pKa values were calculated with the Propka-3.1 program (50)  
515 and residues Glu130, Glu187, Glu207 and Glu243 were protonated. The system was simulated  
516 using the GROMACS 2019 MD simulation engine (51) with the CHARMM36 all-atom force field  
517 (52, 53). The system contained 25,465 TIP3P water molecules, 550 Na-ions and 47 Cl-ions (in total  
518 131,956 atoms). A 5,000-step energy minimization was followed by a 30 ns equilibration run during  
519 which the protein backbone, side chain, lipid, and water atoms were successively unrestrained in  
520 six consecutive 5-ns steps leading to the 500 ns production run. The simulation time step was 2 fs  
521 and a Parrinello-Rahman semi-isotropic pressure coupling (54, 55) with a compressibility of 4.5e-  
522 5 bar<sup>-1</sup> was applied with a coupling constant of 1.0 at 1 bar and the temperature was maintained at  
523 303.15 K using the Nose-Hoover temperature coupling (56, 57). A Cu<sup>2+</sup> ion was added to the final  
524 frame of the production run of 500 ns by replacing a Na<sup>+</sup> ions at the outer membrane entrance and  
525 reparametrizing according to Cu<sup>2+</sup> parameters from (58). The Cu<sup>2+</sup> ion was pulled from the outer to  
526 inner leaflet using the Gromacs pull code. The Cu<sup>2+</sup> ion was pulled for 3.5 ns at a pulling rate of 1.5  
527 nm/ns at a harmonic force of 1000 kJ/mol/nm<sup>2</sup>. The Na and Cl-ions were restrained during pulling  
528 to avoid interference with ion-entry dynamics.

529

### 530 **Acknowledgments**

531 We are grateful for the staff at the Lund Protein Production Platform (LP3) for providing the *E. coli*  
532 834(DE3) strain and for assistance with the early crystallization experiments. We also appreciate  
533 the help with the crystal screening and data collection at the Swiss Light Source (SLS), the Paul  
534 Scherrer Institute, Villigen, beam line X06SAWe acknowledge Zhila Nikrozi and Klaus Qvortrup  
535 from the Core Facility for Integrated Microscopy (CFIM), Faculty of Health and Medical Sciences,  
536 University of Copenhagen for the help of preparing fixed bacteria TEM sample preparation and  
537 imaging, and Prof. Michael Davies for access to stop-flow cytometry equipment. Access to



538 synchrotron sources was supported by The Danscatt program of The Independent Research Fund  
539 Denmark. GM is supported by the National Institute of General Medical Sciences of the National  
540 Institutes of Health (R35GM128704) and by the Robert A. Welch foundation (AT-1935-20170325;  
541 AT-2073-20210327). PG is supported by the following Foundations: Lundbeck, Knut and Alice  
542 Wallenberg, Carlsberg, Novo-Nordisk, Brødrene Hartmann, Agnes og Poul Friis, Augustinus,  
543 Crafoord as well as The Per-Eric and Ulla Schyberg. Funding is also obtained from The  
544 Independent Research Fund Denmark, the Swedish Research Council and through a Michaelsen  
545 scholarship. DRM was funded by Carl Tryggers foundation (CTS 17:22), MA was funded by a  
546 Swedish Research Council Starting Grant (2020-03840). The computations were performed on  
547 resources provided by the Swedish National Infrastructure for Computing (SNIC) through the High-  
548 Performance Computing Center North (HPC2N) under project SNIC 2018/2-32 and SNIC 2019/2-  
549 29. The funders had no role in study design, data collection and analysis, decision to publish, or  
550 preparation of the manuscript. The content is solely the responsibility of the authors and does not  
551 necessarily represent the official views of the National Institutes of Health.

552

#### 553 **Data deposition**

554 The structure of PcoB<sub>Δ32-82</sub> reported in this paper will be released by the Protein Data Bank upon  
555 acceptance of this manuscript (PDB, PDB-ID 7PGE).

556

557 **Figures and Tables**

558 **Figure 1.**

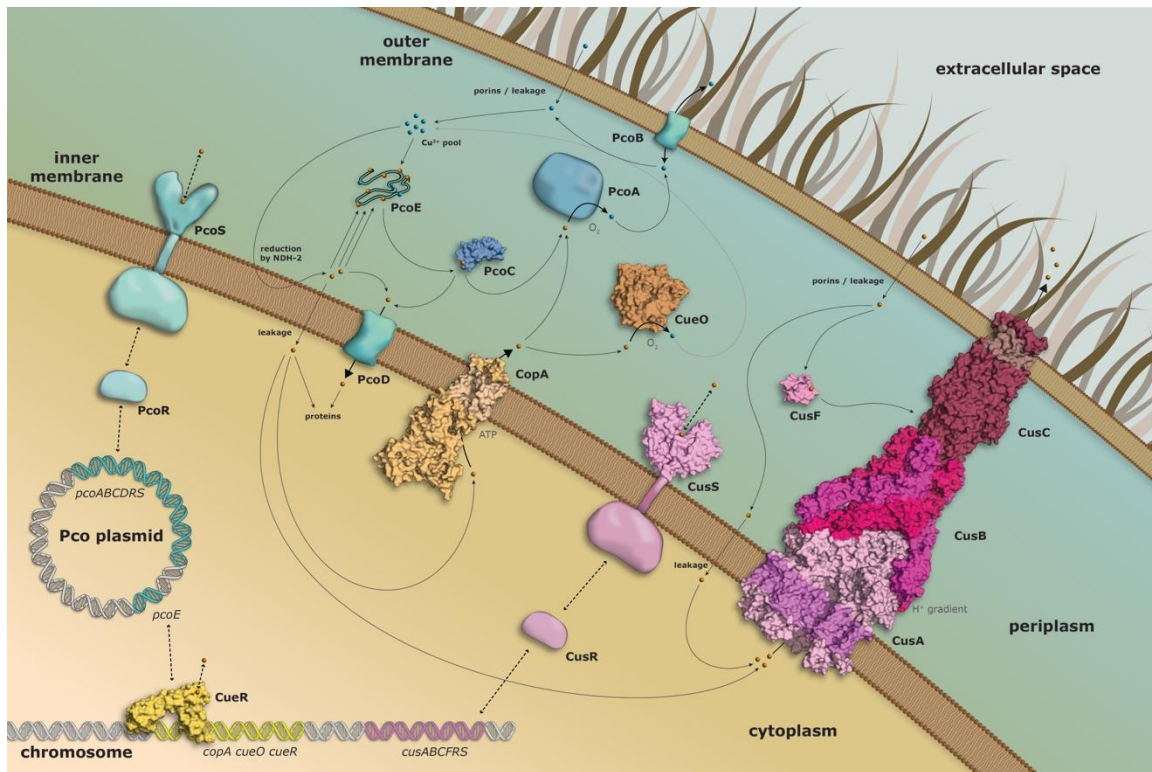

559 **Figure 1. Overview of copper homeostasis proteins in gram negative bacteria.** The Cue/Cop  
560 system (in yellow) is responsible for copper detoxification through removal from the cytoplasm via  
561 CopA and periplasmic oxidation via CueO as regulated by CueR. At higher copper concentrations  
562 or anaerobic conditions, the Cus assembly (purple) provides export from the cytoplasm via CusA,  
563 and from the periplasm via CusF, immediately to the extracellular environment as allowed by CusB  
564 and CusC and with the expression regulated by CusR and CusS. The plasmid born Pco cluster  
565 (cyan) likely has a complementary role, harboring an inner and outer membrane component, PcoD  
566 and PcoB, respectively, and the periplasmic oxidase PcoA as well as the copper-binding PcoC and  
567 PcoE proteins, as regulated by PcoR and PcoS.  
568

569 **Figure 2.**

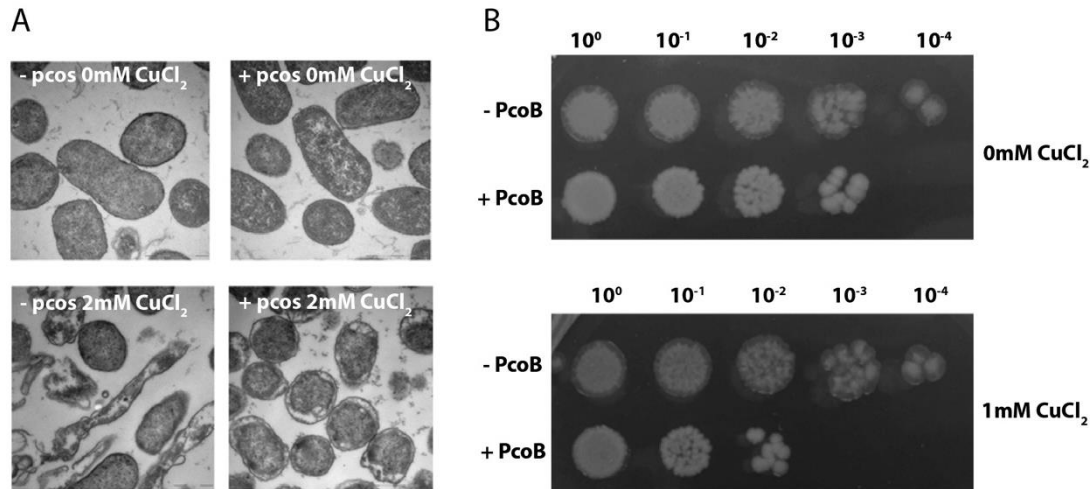

570 **Figure 2. *In vivo* experiments support a protective role of the Pco system while isolated**  
571 **PcoB increases copper sensitivity.** (A) Introduction of the Pco gene cluster (right panels, labelled  
572 with +) rescues *E. coli* viability at elevated (2 mM) copper concentrations (lower panels), as  
573 compared to cells lacking the Pco system (left panels) (B). Comparison of the growth of *E. coli* cells  
574 with or without isolated PcoB at low (no supplementation) and high (1 mM) copper concentrations,  
575 respectively, suggests PcoB alone increases the copper susceptibility of cells  
576

577 **Figure 3.**

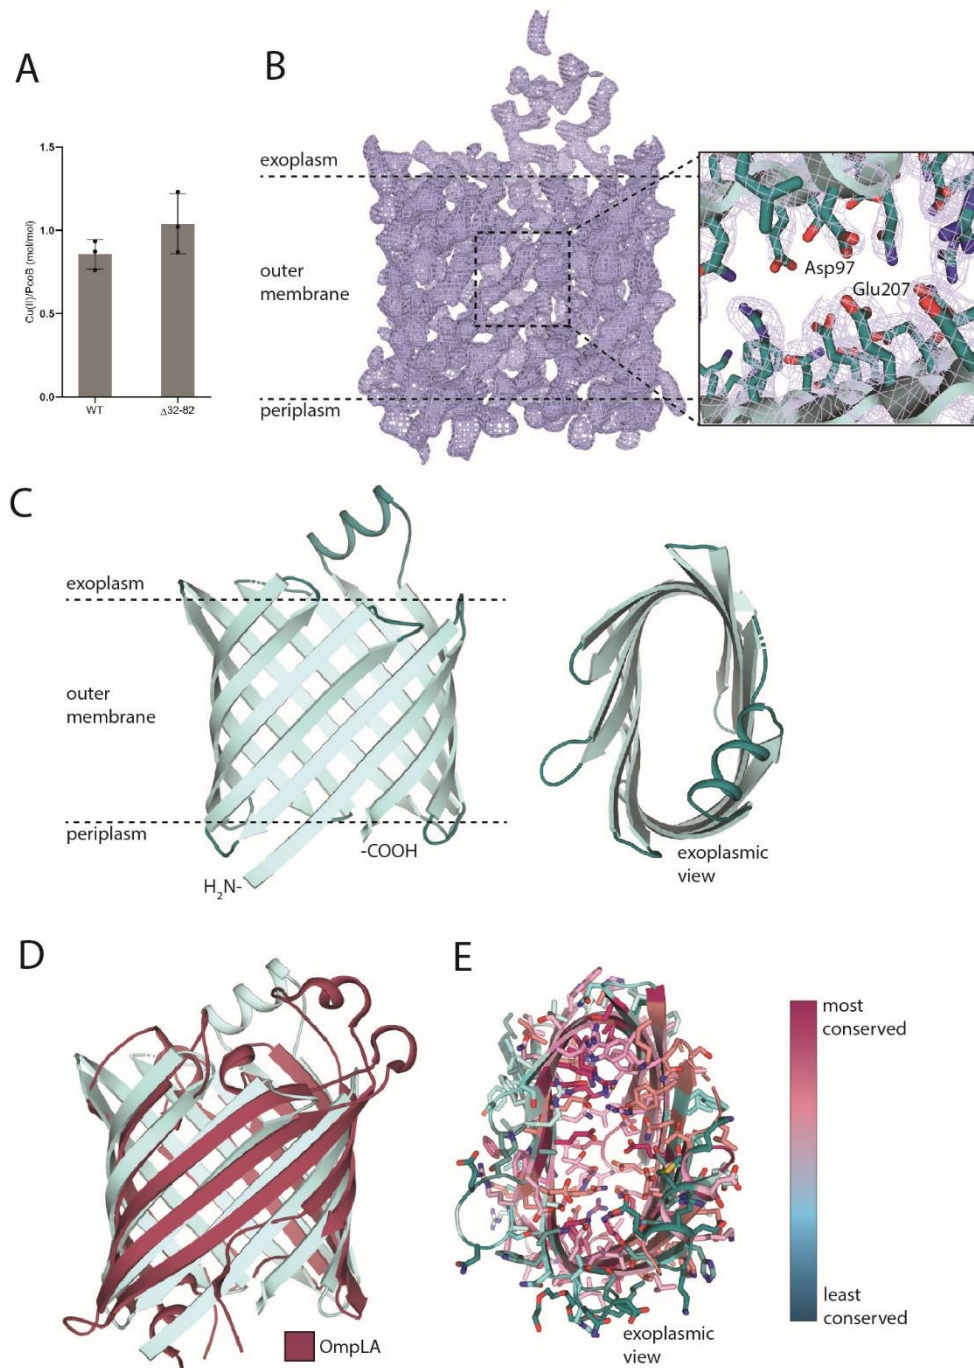

578

579 **Figure 3. The structure of PcoB.** (A) Copper binding stoichiometry as determined using ICP-MS  
580 measurements of full-length (wild-type) and N-terminally truncated PcoB, respectively. A single  
581  $\text{Cu}^{2+}$  ion binds per PcoB molecule. Data denotes 3 independent experiments measurements (N =  
582 3) and error bars represent SD. (B) Final 2Fo-Fc electron density (blue mesh,  $\sigma = 1.0$ ) of PcoB  
583 derived from the 2.2 Å native data. The close view demonstrates the general quality of the map  
584 and the Asp97-Glu207 interaction in the pore region. (C) The overall architecture of PcoB (in cyan)  
585 consisting of 12 beta-sheets that span the outer membrane. The PcoB barrel (cyan) is flattened  
586 through interactions between residue of opposite sides of the inside of the barrel, see also panel  
587 D. (D) Overlay with structurally reminiscent protein OmpLA (dark red, PDB-ID: 1QD6). (E) Analysis  
588 of the conservation of PcoB as determined using ConSurf (31). The analysis shows a spectrum  
589 ranging from low (cyan) to high (magenta) conservation, as also depicted by the color bar. Internal  
590 residues are generally more conserved than membrane facing residues.

591 **Figure 4.**

592 **Figure 4. The pore.** (A) Surface charge representation of PcoB as observed perpendicular to the

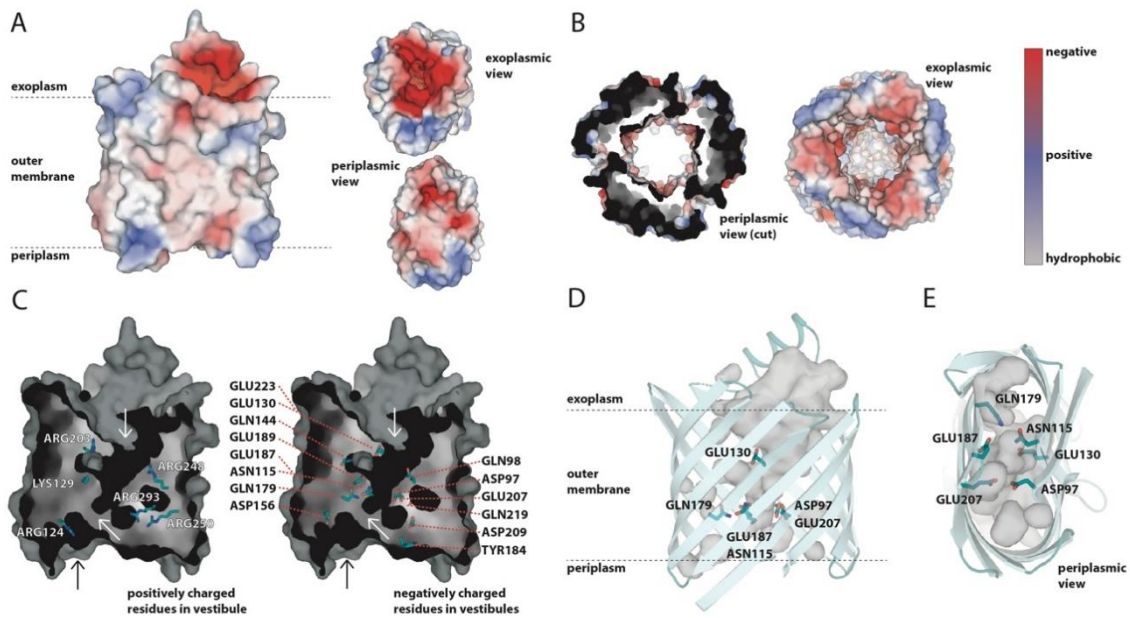

593 membrane, complemented by views from the outside of the cell and from the periplasm,  
594 respectively. Electrostatics are represented as positive (blue), negative (red) and neutral (grey)  
595 charges. (B) Electrostatic representation of CusC (PDB-ID: 3PIK) using the same color  
596 representation as in panel A. The periplasmic view is cut at the outer membrane interface, removing  
597 the soluble domain. (C) Surface representation of the pore and internal cavities combined with  
598 residues of positive and negative charge, respectively. The top white arrow points to the funnel, the  
599 middle white arrow points to the internal constriction site. The black arrow indicates the vestibule  
600 observed in panel A bottom view. (D) Side-view perpendicular to the membrane. Important residues  
601 for the here proposed copper conducting pathway are shown. (E) Periplasmic view (same  
602 orientation as the periplasmic view in panel A), showing the same features as panel D.

603

604 **Figure 5.**

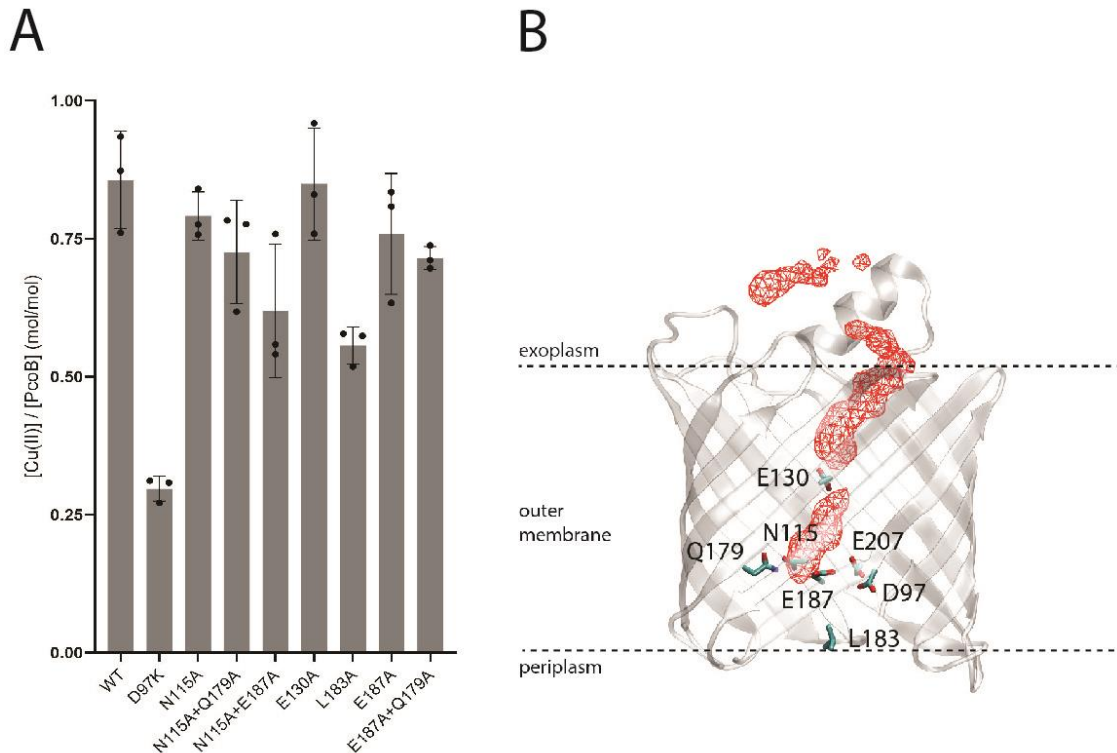

605

606 **Figure 5. Restricted passage and copper binding.** (A)  $Cu^{2+}$  binding stoichiometry of PcoB  
607 mutants as determined using ICP-MS. Data denotes 3 independent measurements ( $N = 3$ ) and  
608 error bars represent SD. The data is congruent with a single ion binding site located at the Asp97-  
609 Glu207 constriction. (B) Isodensity surface (red) at 70 % occupancy representing  $Cu^{2+}$  positions in  
610 the MD simulation to assess ion passage across PcoB.

611 **Figure 6.**

**A**

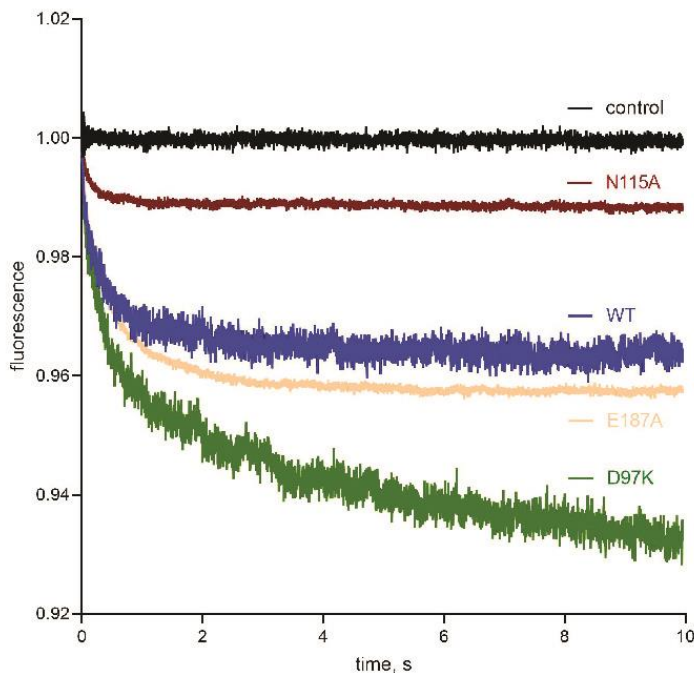

**B**

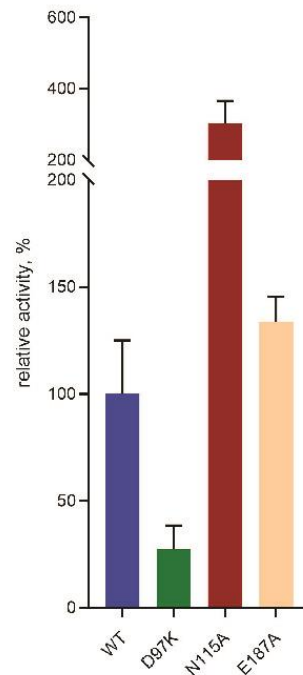

612 **Figure 6. Functional characterization based on a proteoliposome assay.** (A) Wild-type PcoB  
613 (blue) demonstrates flux of  $\text{Cu}^{2+}$ , clearly deviating from the control measurements (black)  
614 performed using empty liposomes. Data are also shown for the three assessed mutant forms.  
615 Traces originate from 5 runs based on triplicate reconstitutions. (B) Bar diagrams of the relative  
616 activity of the investigated PcoB mutants with wild-type set as 100 %. The activity has been  
617 compensated for the amount of protein incorporated into the liposomes (**Figure 6 - figure**  
618 **supplement 1, Figure 6 - table supplement 1**). The shown forms were all well-behaved  
619 throughout the isolation and characterization process. Data are means  $\pm$  SD of the three separate  
620 reconstitutions (N = 3) for each construct.



621 **Table 1. Crystallographic table of PcoB $\Delta$ 32-82 for both native and SeMet crystals**

|                                | <u>NATIVE</u>                          | <u>SE-MET</u>                           |
|--------------------------------|----------------------------------------|-----------------------------------------|
| <b><u>DATA</u></b>             |                                        |                                         |
| COLLECTION WAVELENGTH          | 1                                      | 0.979587                                |
| RESOLUTION RANGE               | 43.53 – 2.0 (2.072 – 2.0)              | 46.25 - 2.62 (2.74 - 2.62)              |
| SPACE GROUP                    | C 2 2 2 <sub>1</sub>                   | P 4 <sub>1</sub> 2 <sub>1</sub> 2       |
| UNIT CELL                      | 65.49 Å 75.54 Å 91.51 Å<br>90° 90° 90° | 64.76 Å 64.76 Å 198.20 Å<br>90° 90° 90° |
| TOTAL REFLECTIONS              | 103621 (10567)                         | 343385 (41634)                          |
| UNIQUE REFLECTIONS             | 15638 (1528)                           | 13396 (1554)                            |
| MULTIPLICITY                   | 6.6 (6.9)                              | 25.6 (26.8)                             |
| COMPLETENESS (%)               | 99.72 (99.74)                          | 99.7 (98.2)                             |
| MEAN I/SIGMA(I)                | 16.51 (2.11)                           | 19.0 (0.8)                              |
| R-MERGE                        | 0.06975 (0.8315)                       | 0.103 (5.697)                           |
| CC1/2                          | 0.999 (0.8)                            | 1.0 (0.676)                             |
| CC*                            | 1 (0.934)                              | 1.0 (1.0)                               |
| ANOMALOUS COMPLETENESS         |                                        | 99.7(98.1)                              |
| ANOMALOUS MULTIPLICITY         |                                        | 14.3(14.4)                              |
| <b><u>REFINEMENT</u></b>       |                                        |                                         |
| REFLECTIONS USED IN REFINEMENT | 15631 (1525)                           |                                         |
| R-WORK                         | 0.2205                                 |                                         |
| R-FREE                         | 0.2533                                 |                                         |
| NUMBER OF NON-HYDROGEN ATOMS   | 1686                                   |                                         |
| MACROMOLECULES                 | 1599                                   |                                         |
| LIGANDS                        | 40                                     |                                         |
| SOLVENT                        | 47                                     |                                         |
| RMS (BONDS)                    | 0.008                                  |                                         |
| RMS (ANGLES)                   | 1.08                                   |                                         |
| AVERAGE B-FACTOR               | 48.02                                  |                                         |
| MACROMOLECULES                 | 47.97                                  |                                         |
| LIGANDS                        | 51.31                                  |                                         |
| SOLVENT                        | 46.87                                  |                                         |

## 622 **References**

- 623 1. Guengerich FP. Introduction to Metals in Biology 2018: Copper homeostasis and utilization in  
624 redox enzymes. *J Biol Chem*. 2018;293(13):4603-5.
- 625 2. Ladomersky E, Petris MJ. Copper tolerance and virulence in bacteria. *Metallomics*.  
626 2015;7(6):957-64.
- 627 3. Dupont CL, Grass G, Rensing C. Copper toxicity and the origin of bacterial resistance--new  
628 insights and applications. *Metallomics*. 2011;3(11):1109-18.
- 629 4. Rensing C, Grass G. *Escherichia coli* mechanisms of copper homeostasis in a changing  
630 environment. *FEMS Microbiol Rev*. 2003;27(2-3):197-213.
- 631 5. Changela A, Chen K, Xue Y, Holschen J, Outten CE, O'Halloran TV, et al. Molecular basis of  
632 metal-ion selectivity and zeptomolar sensitivity by CueR. *Science*. 2003;301(5638):1383-7.
- 633 6. Bondarczuk K, Piotrowska-Seget Z. Molecular basis of active copper resistance mechanisms in  
634 Gram-negative bacteria. *Cell Biol Toxicol*. 2013;29(6):397-405.
- 635 7. Osman D, Martini MA, Foster AW, Chen J, Scott AJP, Morton RJ, et al. Bacterial sensors define  
636 intracellular free energies for correct enzyme metalation. *Nat Chem Biol*. 2019;15(3):241-9.
- 637 8. Rensing C, Fan B, Sharma R, Mitra B, Rosen BP. CopA: An *Escherichia coli* Cu(I)-translocating  
638 P-type ATPase. *Proc Natl Acad Sci U S A*. 2000;97(2):652-6.
- 639 9. Roberts SA, Weichsel A, Grass G, Thakali K, Hazzard JT, Tollin G, et al. Crystal structure and  
640 electron transfer kinetics of CueO, a multicopper oxidase required for copper homeostasis in  
641 *Escherichia coli*. *Proc Natl Acad Sci U S A*. 2002;99(5):2766-71.
- 642 10. Mealman TD, Blackburn NJ, McEvoy MM. Metal Export by CusCFBA, the Periplasmic  
643 Cu(I)/Ag(I) Transport System of *Escherichia coli*. *Curr Top Membr*. 2012;69:163-96.
- 644 11. Long F, Su CC, Zimmermann MT, Boyken SE, Rajashankar KR, Jernigan RL, et al. Crystal  
645 structures of the CusA efflux pump suggest methionine-mediated metal transport. *Nature*.  
646 2010;467(7314):484-8.
- 647 12. Mealman TD, Bagai I, Singh P, Goodlett DR, Rensing C, Zhou HJ, et al. Interactions between  
648 CusF and CusB Identified by NMR Spectroscopy and Chemical Cross-Linking Coupled to Mass  
649 Spectrometry. *Biochemistry*. 2011;50(13):2559-66.
- 650 13. Gudipaty SA, Larsen AS, Rensing C, McEvoy MM. Regulation of Cu(I)/Ag(I) efflux genes in  
651 *Escherichia coli* by the sensor kinase CusS. *Fems Microbiol Lett*. 2012;330(1):30-7.

- 652 14. Munson GP, Lam DL, Outten FW, O'Halloran TV. Identification of a copper-responsive two-  
653 component system on the chromosome of *Escherichia coli* K-12. *J Bacteriol.* 2000;182(20):5864-  
654 71.
- 655 15. Tetaz TJ, Luke RKJ. Plasmid-Controlled Resistance to Copper in *Escherichia-Coli*. *J Bacteriol.*  
656 1983;154(3):1263-8.
- 657 16. Edmonds MS, Izquierdo OA, Baker DH. Feed Additive Studies with Newly Weaned Pigs -  
658 Efficacy of Supplemental Copper, Antibiotics and Organic-Acids. *J Anim Sci.* 1985;60(2):462-9.
- 659 17. Chillappagari S, Miethke M, Trip H, Kuipers OP, Marahiel MA. Copper Acquisition Is Mediated  
660 by YcnJ and Regulated by YcnK and CsoR in *Bacillus subtilis*. *J Bacteriol.* 2009;191(7):2362-70.
- 661 18. Rouch D, Camakaris J, Lee BTO, Luke RKJ. Inducible Plasmid-Mediated Copper Resistance in  
662 *Escherichia-Coli*. *J Gen Microbiol.* 1985;131(Apr):939-43.
- 663 19. Zhang XX, Rainey PB. Regulation of copper homeostasis in *Pseudomonas fluorescens* SBW25.  
664 *Environ Microbiol.* 2008;10(12):3284-94.
- 665 20. Brown NL, Barrett SR, Camakaris J, Lee BTO, Rouch DA. Molecular-Genetics and Transport  
666 Analysis of the Copper-Resistance Determinant (Pco) from *Escherichia-Coli* Plasmid Prj1004. *Mol*  
667 *Microbiol.* 1995;17(6):1153-66.
- 668 21. Zimmermann M, Udagedara SR, Sze CM, Ryan TM, Howlett GJ, Xiao ZG, et al. PcoE - A metal  
669 sponge expressed to the periplasm of copper resistance *Escherichia coli*. Implication of its function  
670 role in copper resistance. *Journal of Inorganic Biochemistry.* 2012;115:186-97.
- 671 22. Huffman DL, Huyett J, Outten FW, Doan PE, Finney LA, Hoffman BM, et al. Spectroscopy of  
672 Cu(II)-PcoC and the multicopper oxidase function of PcoA, two essential components of  
673 *Escherichia coli* pco copper resistance operon. *Biochemistry.* 2002;41(31):10046-55.
- 674 23. Teitzel GM, Geddie A, De Long SK, Kirisits MJ, Whiteley M, Parsek MR. Survival and growth in  
675 the presence of elevated copper: Transcriptional profiling of copper-stressed *Pseudomonas*  
676 *aeruginosa*. *J Bacteriol.* 2006;188(20):7242-56.
- 677 24. Lee SM, Grass G, Rensing C, Barrett SR, Yates CJD, Stoyanov JV, et al. The Pco proteins are  
678 involved in periplasmic copper handling in *Escherichia coli*. *Biochem Bioph Res Co.*  
679 2002;295(3):616-20.
- 680 25. Hernandez-Montes G, Arguello JM, Valderrama B. Evolution and diversity of periplasmic  
681 proteins involved in copper homeostasis in gamma proteobacteria. *Bmc Microbiol.* 2012;12.

- 682 26.Lawaree E, Gillet S, Louis G, Tilquin F, Le Blastier S, Cambier P, et al. Caulobacter crescentus  
683 intrinsic dimorphism provides a prompt bimodal response to copper stress. Nat Microbiol.  
684 2016;1(9).
- 685 27.Djoko KY, Xiao Z, Wedd AG. Copper resistance in E. coli: the multicopper oxidase PcoA  
686 catalyzes oxidation of copper(I) in Cu(I)Cu(II)-PcoC. Chembiochem. 2008;9(10):1579-82.
- 687 28.Cha JS, Cooksey DA. Copper resistance in Pseudomonas syringae mediated by periplasmic  
688 and outer membrane proteins. Proc Natl Acad Sci U S A. 1991;88(20):8915-9.
- 689 29.Schulz GE. The structure of bacterial outer membrane proteins. Biochim Biophys Acta.  
690 2002;1565(2):308-17.
- 691 30.Snijder HJ, Ubarretxena-Belandia I, Blaauw M, Kalk KH, Verheij HM, Egmond MR, et al.  
692 Structural evidence for dimerization-regulated activation of an integral membrane phospholipase.  
693 Nature. 1999;401(6754):717-21.
- 694 31.Ashkenazy H, Abadi S, Martz E, Chay O, Mayrose I, Pupko T, et al. ConSurf 2016: an improved  
695 methodology to estimate and visualize evolutionary conservation in macromolecules. Nucleic Acids  
696 Res. 2016;44(W1):W344-50.
- 697 32.Kulathila R, Kulathila R, Indic M, van den Berg B. Crystal structure of Escherichia coli CusC, the  
698 outer membrane component of a heavy metal efflux pump. PLoS One. 2011;6(1):e15610.
- 699 33.Pearson RG. Hard and Soft Acids and Bases. Journal of the American Chemical society.  
700 1963;85:3533-9.
- 701 34.Kitchen P, Salman MM, Halsey AM, Clarke-Bland C, MacDonald JA, Ishida H, et al. Targeting  
702 Aquaporin-4 Subcellular Localization to Treat Central Nervous System Edema. Cell.  
703 2020;181(4):784-99 e19.
- 704 35.Hopf TA, Green AG, Schubert B, Mersmann S, Scharfe CPI, Ingraham JB, et al. The  
705 EVcouplings Python framework for coevolutionary sequence analysis. Bioinformatics.  
706 2019;35(9):1582-4.
- 707 36.Wang K, Preisler SS, Zhang L, Cui Y, Missel JW, Gronberg C, et al. Structure of the human  
708 CIC-1 chloride channel. PLoS Biol. 2019;17(4):e3000218.
- 709 37.Quintana J, Novoa-Aponte L, Arguello JM. Copper homeostasis networks in the bacterium  
710 Pseudomonas aeruginosa. J Biol Chem. 2017;292(38):15691-704.
- 711 38.Kabsch W. Xds. Acta Crystallogr D Biol Crystallogr. 2010;66(Pt 2):125-32.

- 712 39.Adams PD, Afonine PV, Bunkoczi G, Chen VB, Davis IW, Echols N, et al. PHENIX: a  
713 comprehensive Python-based system for macromolecular structure solution. *Acta Crystallogr D*  
714 *Biol Crystallogr.* 2010;66(Pt 2):213-21.
- 715 40.Terwilliger TC, Grosse-Kunstleve RW, Afonine PV, Moriarty NW, Zwart PH, Hung LW, et al.  
716 Iterative model building, structure refinement and density modification with the PHENIX AutoBuild  
717 wizard. *Acta Crystallogr D Biol Crystallogr.* 2008;64(Pt 1):61-9.
- 718 41.Emsley P, Lohkamp B, Scott WG, Cowtan K. Features and development of Coot. *Acta*  
719 *Crystallogr D Biol Crystallogr.* 2010;66(Pt 4):486-501.
- 720 42.Afonine PV, Grosse-Kunstleve RW, Echols N, Headd JJ, Moriarty NW, Mustyakimov M, et al.  
721 Towards automated crystallographic structure refinement with phenix.refine. *Acta Crystallogr D Biol*  
722 *Crystallogr.* 2012;68(Pt 4):352-67.
- 723 43.Shah MT, Alveroglu E, Balouch A. Pyranine functionalized Fe<sub>3</sub>O<sub>4</sub> nanoparticles for the sensitive  
724 fluorescence detection of Cu<sup>2+</sup> ions. *J Alloy Compd.* 2018;767:151-62.
- 725 44.Saha T, Sengupta A, Hazra P, Talukdar P. In vitro sensing of Cu<sup>+</sup> through a green fluorescence  
726 rise of pyranine. *Photoch Photobio Sci.* 2014;13(10):1427-33.
- 727 45.Verchere A, Dezi M, Adrien V, Broutin I, Picard M. In vitro transport activity of the fully assembled  
728 MexAB-OprM efflux pump from *Pseudomonas aeruginosa*. *Nat Commun.* 2015;6:6890.
- 729 46.Wu EL, Cheng X, Jo S, Rui H, Song KC, Davila-Contreras EM, et al. CHARMM-GUI Membrane  
730 Builder toward realistic biological membrane simulations. *J Comput Chem.* 2014;35(27):1997-  
731 2004.
- 732 47.Jo S, Kim T, Iyer VG, Im W. CHARMM-GUI: a web-based graphical user interface for CHARMM.  
733 *J Comput Chem.* 2008;29(11):1859-65.
- 734 48.Wu EL, Fleming PJ, Yeom MS, Widmalm G, Klauda JB, Fleming KG, et al. E. coli outer  
735 membrane and interactions with OmpLA. *Biophys J.* 2014;106(11):2493-502.
- 736 49.Lomize MA, Pogozheva ID, Joo H, Mosberg HI, Lomize AL. OPM database and PPM web  
737 server: resources for positioning of proteins in membranes. *Nucleic Acids Res.* 2012;40(Database  
738 issue):D370-6.
- 739 50.Olsson MH, Sondergaard CR, Rostkowski M, Jensen JH. PROPKA3: Consistent Treatment of  
740 Internal and Surface Residues in Empirical pKa Predictions. *J Chem Theory Comput.*  
741 2011;7(2):525-37.

- 742 51. Mark James Abraham TM, Roland Schulz, Szilárd Páll, Jeremy C. Smith, Berk Hess, Erik  
743 Lindahl. GROMACS: High performance molecular simulations through multi-level parallelism from  
744 laptops to supercomputers. *SoftwareX*. 2015;1-2:19-25.
- 745 52. Klauda JB, Venable RM, Freites JA, O'Connor JW, Tobias DJ, Mondragon-Ramirez C, et al.  
746 Update of the CHARMM all-atom additive force field for lipids: validation on six lipid types. *J Phys*  
747 *Chem B*. 2010;114(23):7830-43.
- 748 53. Best RB, Zhu X, Shim J, Lopes PE, Mittal J, Feig M, et al. Optimization of the additive CHARMM  
749 all-atom protein force field targeting improved sampling of the backbone phi, psi and side-chain  
750 chi(1) and chi(2) dihedral angles. *J Chem Theory Comput*. 2012;8(9):3257-73.
- 751 54. Michele Parrinello AR. Polymorphic transitions in single crystals: A new molecular dynamics  
752 method. *Journal of Applied physics*. 1981;52(12):7182-90.
- 753 55. Shuichi Nosé MLK. Constant pressure molecular dynamics for molecular systems. *Molecular*  
754 *Physics*. 1983;50(5):1055-76.
- 755 56. Hoover WG. Canonical dynamics: Equilibrium phase-space distributions. *Phys Rev A Gen*  
756 *Phys*. 1985;31(3):1695-7.
- 757 57. Nose S. A unified formulation of the constant temperature molecular dynamics methods. *Journal*  
758 *of Chemical Physics*. 1984;81(1):511-9.
- 759 58. Babu CS, Lim C. Empirical force fields for biologically active divalent metal cations in water. *J*  
760 *Phys Chem A*. 2006;110(2):691-9.
- 761

762 **Supplementary Information for**

763

764 **PcoB is a defense outer membrane protein that facilitates cellular**  
765 **uptake of copper.**

766 Ping Li<sup>1#</sup>, Niloofar Nayeri<sup>1#</sup>, Kamil Gorecki<sup>1</sup>, Eva Ramos Becares<sup>2</sup>, Kaituo Wang<sup>2</sup>, Dhani Ram  
767 Mahato<sup>3</sup>, Magnus Andersson<sup>3</sup>, Sameera Abeyrathna<sup>4</sup>, Karin Lindkvist-Petersson<sup>1</sup>, Gabriele  
768 Meloni<sup>4</sup>, Julie Winkel Missel<sup>2</sup> & Pontus Gourdon<sup>1,2,\*</sup>

769 1 Lund University, Department of Experimental Medical Science, Sölvegatan 19, SE-221 84,  
770 Lund, Sweden

771 2 University of Copenhagen, Department of Biomedical Sciences, Nørre Allé 14, DK-2200,  
772 Copenhagen N, Denmark

773 3 Department of Chemistry, Umeå University, Linneaus Väg 10, 901 87 Umeå, Sweden

774 4 Department of Chemistry and Biochemistry, The University of Texas at Dallas, 800 W Campbell  
775 Rd., Richardson, TX 75080, USA

776

777 \* corresponding author

778 # contributed equally

779 **Email: [pontus.gourdon@med.lu.se](mailto:pontus.gourdon@med.lu.se)**

780

781 **This PDF file includes:**

782

783       Supplementary Figures 1-6

784       Supplementary Table 1

785

786 **Figure 3 - figure supplement 1.**

**Full-length PcoB (PcoB<sub>FL</sub>)**

|                     |                                           |     |                  |
|---------------------|-------------------------------------------|-----|------------------|
| 1-23 signal peptide | 24-296 copper resistance protein B (PcoB) | TEV | His <sub>6</sub> |
|---------------------|-------------------------------------------|-----|------------------|

**N-terminally truncated PcoB (PcoB<sub>Δ32-82</sub>)**

|                     |                                           |     |                  |
|---------------------|-------------------------------------------|-----|------------------|
| 1-23 signal peptide | Δ32-82 copper resistance protein B (PcoB) | TEV | His <sub>6</sub> |
|---------------------|-------------------------------------------|-----|------------------|

787 **Figure 3 - figure supplement 1. Construct design of PcoB.**

788

789

790

791 **Figure 3 - figure supplement 2**

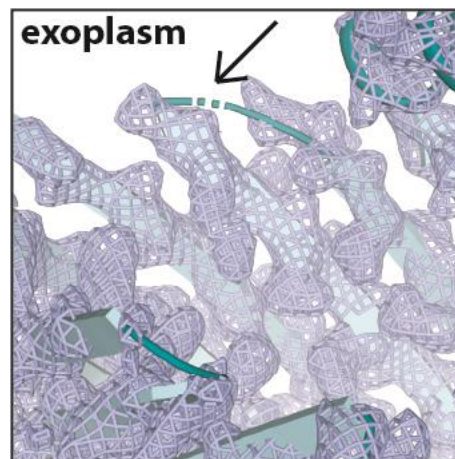

792 **Figure 3 - figure supplement 2. Details of the structure of PcoB.** The disordered loop region in  
793 the PcoB structure (cyan). The final 2Fo-Fc electron density is shown in blue mesh,  $\sigma = 1.0$ . Arrow  
794 points to the unmodeled loop (dashed line).



795 **Figure 3 - figure supplement 3.**

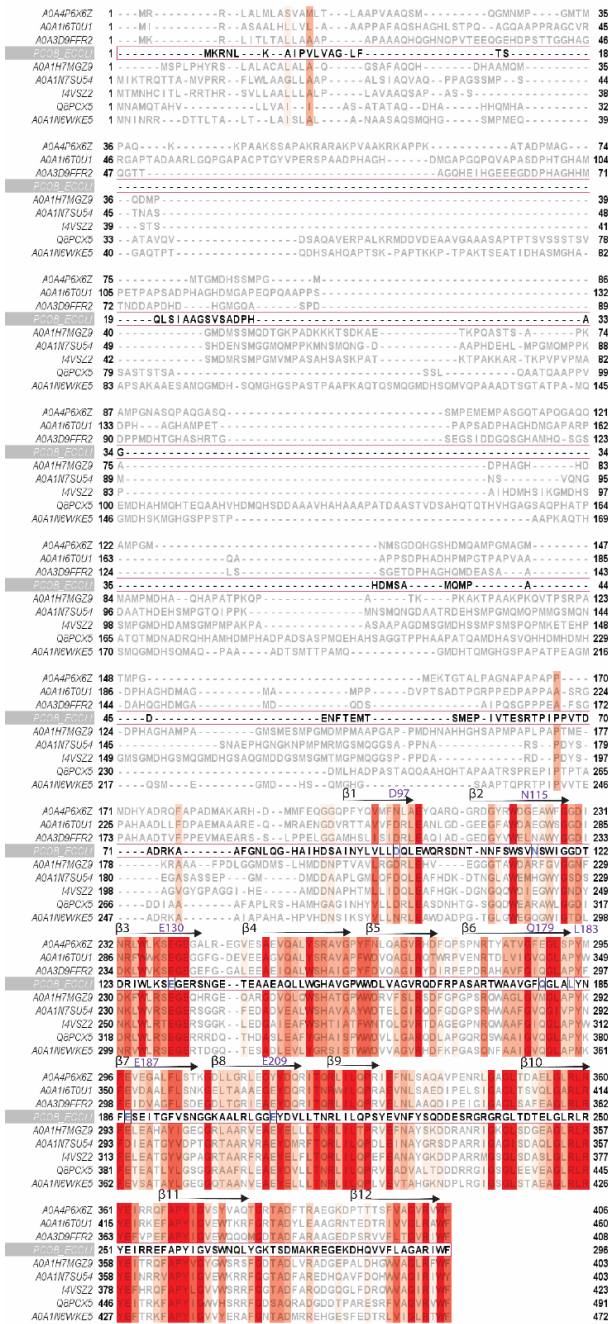

796 **Figure 3 - figure supplement 3. Sequence conservation among PcoB proteins.** Accession  
 797 numbers refer to Uniprot with *E. coli* PcoB highlighted in bold. Red columns indicate the most  
 798 conserved residues. Structurally and functionally important residues are shown in purple with  
 799 the residue number of *E. coli* PcoB indicated above each row. The location of the  $\beta$ -strands of the  
 800 structure is shown. The alignment was generated through a Uniprot Blastp search using the *E. coli*  
 801 PcoB as a template, thereby securing 250 proteins. These sequences were aligned using Clustal  
 802 Omega and sequence redundancy (higher than 75 % identity) was removed using Jalview.

803 **Figure 4 - figure supplement 1.**

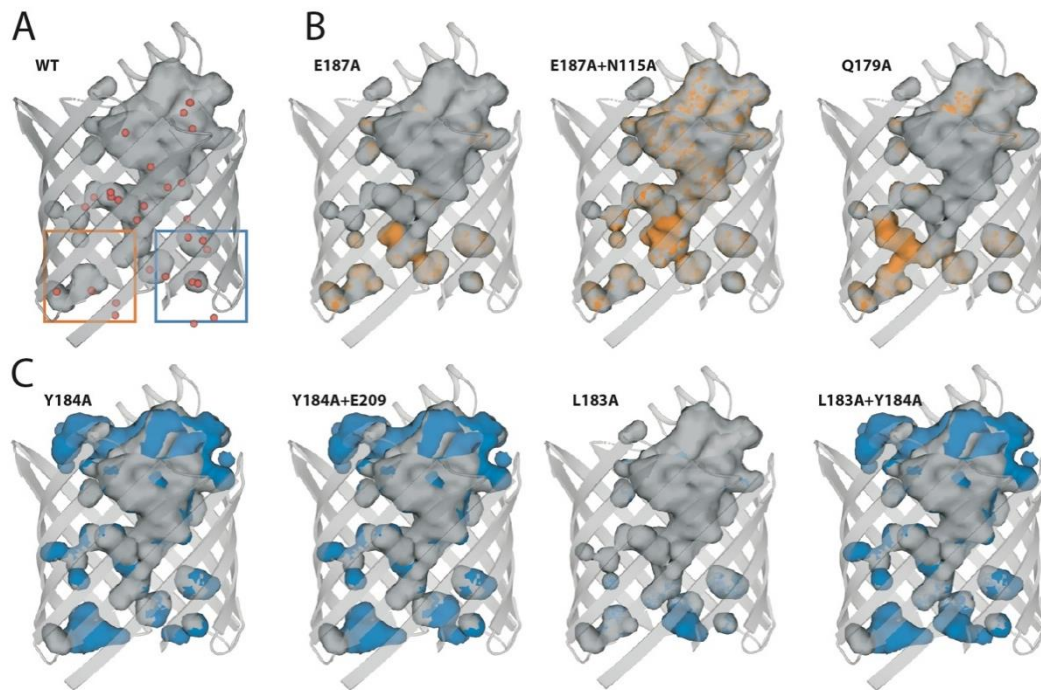

804 **Figure 4 - figure supplement 1. Two putative exit paths in PcoB. (A)** The structurally determined  
805 wild-type PcoB (gray) does not provide a continuous pore as shown using the surface of internal  
806 cavities (grey) and crystal waters (red spheres). *In silico* analysis was conducted to assess if mutant  
807 forms may render the pore more open. **(B)** Mutations related to the proposed exit pathway (orange).  
808 From left to right: Glu187Ala; Glu187Ala and Asn115Ala; Gln179Ala. **(C)** From left to right:  
809 Tyr184Ala; Tyr184Ala and Glu209Ala; Leu183Ala; Leu183Ala and Tyr184Ala.

810 **Figure 6 - figure supplement 1.**

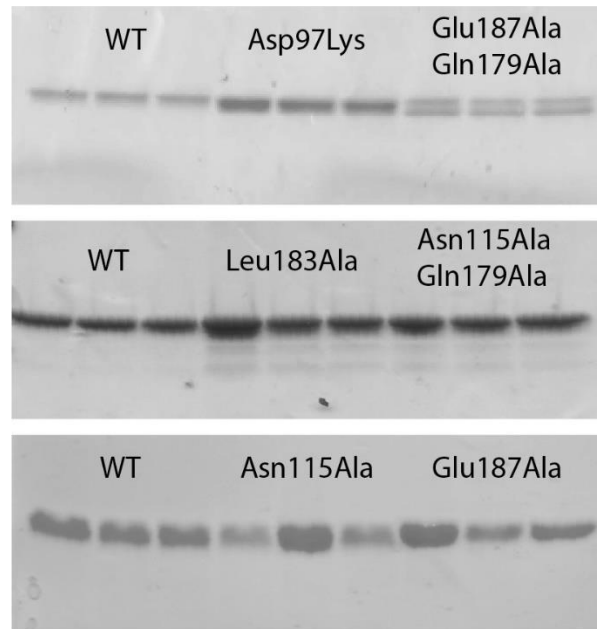

811 **5. Figure 6 - figure supplement 1. SDS-PAGE gels for various PcoB mutants.** SDS-PAGE  
812 used for analyses of all PcoB forms reconstituted into liposomes (**Figure 6 - table supplement 1**).  
813 All mutations were quantified against wild-type (WT). The double mutants and Leu183Ala showed  
814 degrees of degradation, and were excluded from the final analysis.

815 **Figure 6 - figure supplement 2.**

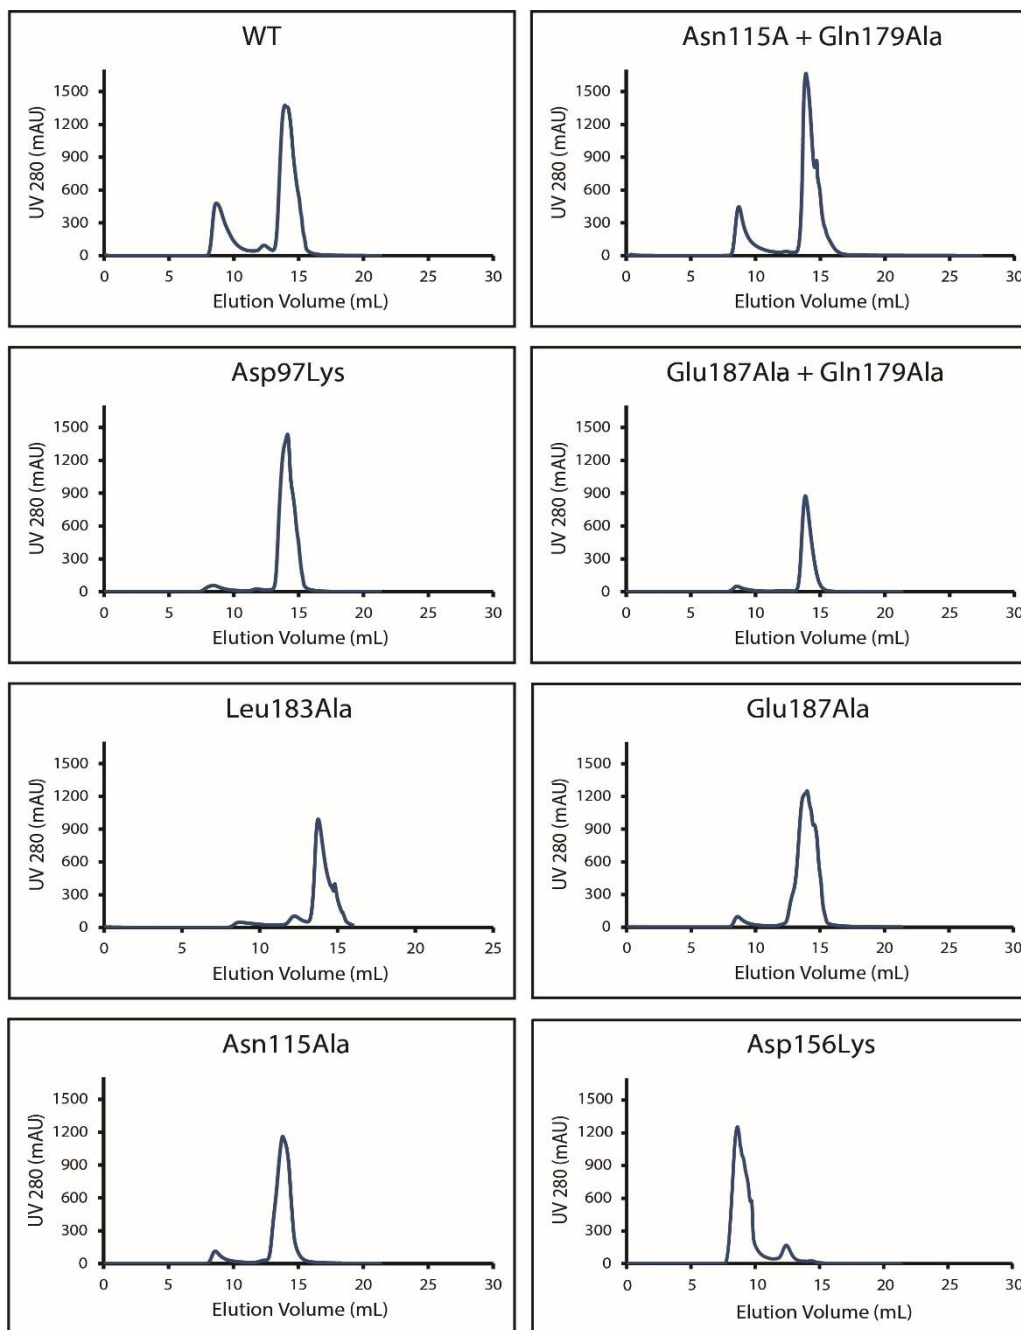

816 **Figure 6 - figure supplement 2. Size-exclusion chromatography profiles of the studied PcoB**  
817 **forms.** His-tagged cleaved samples were injected into a pre-equilibrated Superdex 200 Increase  
818 10/300 GL column mounted on an Äkta Avant system. The employed buffer included 20 mM Tris-  
819 HCl pH=8, 100 mM NaCl, 5 % Glycerol, 0.8% OG and the flow rate was 0.4 mL/min for all forms.

820 **Figure 6 - table supplement 1.**

|                   | <u>WT</u> | <u>ASP97LYS</u> | <u>ASN115ALA</u> | <u>GLU187ALA</u> |
|-------------------|-----------|-----------------|------------------|------------------|
| <u>CONSTANT #</u> |           |                 |                  |                  |
| 1                 | 1.0       | 2.2             | 0.7              | 1.0              |
| 2                 | 1.1       | 2.2             | 1.6              | 0.8              |
| 3                 | 1.1       | 2.2             | 0.9              | 1.5              |

821

822 **Figure 6 - table supplement 1. Quantification constants of the three separate reconstitutions**  
823 **using ImageJ of the SDS-PAGE.** SDS-PAGE quantification analyses of all PcoB forms  
824 reconstituted in liposomes. All mutations were quantified against the first wild-type (WT) lane  
825 **(Figure 6, Figure 6 - figure supplement 1, Figure 6 - source data 1)** normalized to 1.0. The  
826 analysis was performed by plotting the band intensities in ImageJ and taking the integral from these  
827 separate plots. The factors were then divided by the integral from the WT lane 1, giving the  
828 constants in this table, of which the relative activity could be adjusted (Figure 6B).
